# Supplementary material for: Culturally adapted pulmonary rehabilitation for adults living with post-tuberculosis lung disease in Kyrgyzstan: protocol for a randomised controlled trial with blinded outcome measures
Source: HighWire-hosted journal article supplement (doi:10.1136/bmjopen-2021-048664), 2022-02-01
Supplement: bmjopen-2021-048664supp001_data_supplement.pdf [file bmjopen-2021-048664supp001_data_supplement.pdf]

**APPENDIX A: Pulmonary Rehabilitation Satisfaction Survey**

| <i>Please tick the relevant column for your answer to each statement below:</i>         | <b>Strongly Disagree</b> | <b>Disagree</b> | <b>Neutral</b> | <b>Agree</b> | <b>Strongly Agree</b> |
|-----------------------------------------------------------------------------------------|--------------------------|-----------------|----------------|--------------|-----------------------|
| I can do more of my daily activities since completing pulmonary rehabilitation.         |                          |                 |                |              |                       |
| My levels of fitness have improved since beginning pulmonary rehabilitation.            |                          |                 |                |              |                       |
| I have found pulmonary rehabilitation to be worthwhile.                                 |                          |                 |                |              |                       |
| The information in the education talks was useful.                                      |                          |                 |                |              |                       |
| Pulmonary rehabilitation has helped me to manage my lung condition more effectively.    |                          |                 |                |              |                       |
| I would recommend this pulmonary rehabilitation course to others with a lung condition. |                          |                 |                |              |                       |

- **What were the most useful aspects of the course?**

- **Is there anything you feel we could add to the course?**

- **Do you have a comment that that we could use for promotion of the programme which would encourage other patients to participate?**

**Thank you very much for taking the time to complete this survey.**

Supplementary Table 1. Schedule of PR sessions

| Components & duration                                                                                                                                          | Week 1                                                                              |                                                       | Week 2                                      |                                                    | Week 3                                                                            |                                                 |
|----------------------------------------------------------------------------------------------------------------------------------------------------------------|-------------------------------------------------------------------------------------|-------------------------------------------------------|---------------------------------------------|----------------------------------------------------|-----------------------------------------------------------------------------------|-------------------------------------------------|
|                                                                                                                                                                | Class 1                                                                             | Class 2                                               | Class 3                                     | Class 4                                            | Class 5                                                                           | Class 6                                         |
| Education and tea (35 min): <ul style="list-style-type: none"> <li>Lectures (15 min)</li> <li>Questions and feedback (10 min)</li> <li>Tea (10 min)</li> </ul> | Drug treatment and the use of inhalers, as well as why they are prescribed          | Healthy nutrition and its role in human life          | Strategies for coping with PTBLD            | Chest infections and what to do if symptoms worsen | Pulmonary rehabilitation: continuation of the programme at home                   | Question and Answer session                     |
| Upper body resistance training                                                                                                                                 | Weights, Theraband                                                                  | Weights, Theraband                                    | Weights, Theraband                          | Weights, Theraband                                 | Weights, Theraband                                                                | Weights, Theraband                              |
| Lower body resistance training                                                                                                                                 | Sit-to-stand, stepping up-down                                                      | Sit-to-stand, stepping up-down                        | Sit-to-stand, stepping up-down              | Sit-to-stand, stepping up-down                     | Sit-to-stand, stepping up-down                                                    | Sit-to-stand, stepping up-down                  |
| Aerobic training                                                                                                                                               | Walking, cycling                                                                    | Walking, cycling                                      | Walking, cycling                            | Walking, cycling                                   | Walking, cycling                                                                  | Walking, cycling                                |
| Components & duration                                                                                                                                          | Week 4                                                                              |                                                       | Week 5                                      |                                                    | Week 6                                                                            |                                                 |
|                                                                                                                                                                | Class 7                                                                             | Class 8                                               | Class 9                                     | Class 10                                           | Class 11                                                                          | Class 12                                        |
| Education and tea (35 min): <ul style="list-style-type: none"> <li>Lectures (15 min)</li> <li>Questions and feedback (10 min)</li> </ul> Tea (10 min)          | Information about the respiratory system and possible causes of shortness of breath | What is tuberculosis and how does it affect the lungs | Your experience of living with and after TB | Co-diseases and their impact                       | Pulmonary rehabilitation: the role of exercise in building strength and endurance | Cigarette smoking and exposure to biomass smoke |
| Upper body resistance training                                                                                                                                 | Weights, Theraband                                                                  | Weights, Theraband                                    | Weights, Theraband                          | Weights, Theraband                                 | Weights, Theraband                                                                | Weights, Theraband                              |
| Lower body resistance training                                                                                                                                 | Sit-to-stand, stepping up-down                                                      | Sit-to-stand, stepping up-down                        | Sit-to-stand, stepping up-down              | Sit-to-stand, stepping up-down                     | Sit-to-stand, stepping up-down                                                    | Sit-to-stand, stepping up-down                  |
| Aerobic training                                                                                                                                               | Walking, cycling                                                                    | Walking, cycling                                      | Walking, cycling                            | Walking, cycling                                   | Walking, cycling                                                                  | Walking, cycling                                |

**Supplementary Table 2. Physical activity data collection and accelerometry processing criteria**

| Criteria                            | Details                                                                                                                                                                                                                    |
|-------------------------------------|----------------------------------------------------------------------------------------------------------------------------------------------------------------------------------------------------------------------------|
| Accelerometer Model                 | ActiGraph wGT3X-BT (version 6.13.4; firmware 1.9.2)                                                                                                                                                                        |
| Serial number range                 | Twenty unique devices will be used; ranging from MOS2E09190617 to MOS2E25190750 and averaging six deployments per device (same serial used for baseline and follow-up wear periods to remove any inter-device variability) |
| Piezosensor orientation             | Triaxial                                                                                                                                                                                                                   |
| Mode setup                          | Mode 29 (x, y, z, steps, lux)                                                                                                                                                                                              |
| Original sample rate                | 100 Hz (.gt3x file format)                                                                                                                                                                                                 |
| Deployment method                   | Baseline:<br>Fitted by research team on Day 0 (Baseline PR Assessment)<br>Fitted by participant on Day 1<br>Follow-up:<br>Fitted by research team Day 0 (11th/12th session)<br>Fitted by participant on Day 1              |
| Location worn                       | Anterior hip adjacent to the mid-line of the thigh                                                                                                                                                                         |
| Requested days of wear              | 7 days of free-living (10,080 epochs)                                                                                                                                                                                      |
| Initialization                      | Not deployed in delay mode in order to standardised capture of Day 0 (00:00) with stop time based on date of first PR class (baseline) and date of follow-up assessment                                                    |
| Wear instructions                   | Wear continuously except for sleep and water-based activities                                                                                                                                                              |
| Non-wear appropriation              | ≥60 min of consecutive 0s with allowance for 2 minutes of interruptions                                                                                                                                                    |
| Valid day criteria                  | ≥8 hours of valid waking wear time                                                                                                                                                                                         |
| Valid file                          | ≥4 valid days for each of the two time points                                                                                                                                                                              |
| Missing data                        | Data modelling or imputation will not be performed                                                                                                                                                                         |
| Epoch length                        | 60 seconds                                                                                                                                                                                                                 |
| Intensity classification (absolute) | Uniaxial (x-axis) intensity cut-points as follows: Stationary <100 cpm; Light 100-2019 cpm; Moderate 2020-5998cpm; Vigorous ≥5999cpm (Moderate-to-vigorous ≥2020 cpm)                                                      |
| Intensity classification (relative) | Uniaxial (x-axis) cut-points based on Endurance Shuttle Walk Test performance                                                                                                                                              |
